# Supplementary material
Source: PubMed Central journal article supplement (PMC9547669)
Supplement: NIHMS1835693-supplement-1.pdf [file NIHMS1835693-supplement-1.pdf]

SUPPLEMENTAL TABLES

| <b>Supplemental Table 1: Predictors of Evaluation by Surgical Oncology</b> |           |                   |                |
|----------------------------------------------------------------------------|-----------|-------------------|----------------|
|                                                                            |           | <b>Univariate</b> |                |
|                                                                            | <b>OR</b> | <b>95% CI</b>     | <b>P value</b> |
| <b>Variable</b>                                                            |           |                   |                |
| Age (per decade)                                                           | 0.192     | 0.08-0.44         | <0.001         |
| Male                                                                       | 0.978     | 0.27-3.49         | 0.97           |
| Non-married                                                                | 0.607     | 0.15-2.46         | 0.49           |
| Employed                                                                   | 0.612     | 0.28-1.31         | 0.21           |
| Low SES                                                                    | 0.545     | 0.14-2.17         | 0.39           |
| BMI, per point                                                             | 0.957     | 0.86-1.06         | 0.41           |
| CCI, per point                                                             | 0.557     | 0.32-0.95         | 0.03           |
| Signet Cells                                                               | 0.62      | 0.13-2.84         | 0.54           |
| <b>Circumstances of Diagnosis</b>                                          |           |                   |                |
| Setting                                                                    |           |                   |                |
| Inpatient                                                                  | ref       |                   |                |
| Outpatient                                                                 | 2.943     | 0.61-14.12        | 0.18           |

| <b>Supplemental Table 2: Predictors of Survival</b> |           |                   |                |           |                     |                |
|-----------------------------------------------------|-----------|-------------------|----------------|-----------|---------------------|----------------|
|                                                     |           | <b>Univariate</b> |                |           | <b>Multivariate</b> |                |
| <b>Variable</b>                                     | <b>HR</b> | <b>95% CI</b>     | <b>P value</b> | <b>HR</b> | <b>95% CI</b>       | <b>P value</b> |
| Age (decade)                                        | 1.257     | 1.06-1.49         | 0.008          | 1.105     | 0.94-1.29           | 0.22           |
| Male                                                | 1.052     | 0.72-1.53         | 0.79           |           |                     |                |
| Race                                                |           |                   |                |           |                     |                |
| White                                               | ref       |                   | 0.03           |           |                     |                |
| Black                                               | 2.280     | 1.22-4.26         |                |           |                     |                |
| Asian                                               | 0.761     | 0.11-5.46         |                |           |                     |                |
| Non-Married                                         | 1.679     | 1.10-2.56         | 0.02           |           |                     |                |
| Insurance Status                                    |           |                   | 0.12           |           |                     |                |
| Private                                             | ref       |                   |                |           |                     |                |
| Medicare                                            | 1.540     | 1.02-2.32         |                |           |                     |                |
| Medicaid/Uninsured                                  | 1.061     | 0.46-2.45         |                |           |                     |                |
| Employed                                            | 0.770     | 0.53-1.12         | 0.17           |           |                     |                |
| Low SES                                             | 1.536     | 1.05-2.25         | 0.03           | 1.493     | 0.99-2.35           | 0.05           |
| Travel Time from Index Facility, per hour           | 0.973     | 0.93-1.02         | 0.29           |           |                     |                |
| CCI, per point                                      | 1.339     | 1.05-1.71         | 0.02           | 0.954     | 0.73-1.24           | 0.73           |
| BMI                                                 | 1.018     | 0.98-1.05         | 0.31           |           |                     |                |
| <b>Oncologic Variables</b>                          |           |                   |                |           |                     |                |
| Grade                                               |           |                   | <0.001         |           |                     | <0.001         |
| G1                                                  | ref       |                   |                | ref       |                     |                |
| G2                                                  | 4.954     | 2.25-10.93        |                | 9.632     | 3.57-25.97          |                |
| G3                                                  | 8.024     | 3.80-16.92        |                | 15.682    | 5.76-42.70          |                |
| Signet Cells                                        | 2.796     | 1.88-4.16         | <0.001         |           |                     |                |
| Peritoneal Metastases on Diagnosis                  | 0.441     | 0.22-0.88         | 0.02           |           |                     |                |
| <b>Treatment</b>                                    |           |                   |                |           |                     |                |
| Chemotherapy                                        | 2.025     | 1.18-3.47         | 0.01           | 0.391     | 0.19-0.80           | 0.01           |
| CRS HIPEC                                           | 0.163     | 0.11-0.25         | <0.001         | 0.266     | 0.17-0.43           | <0.001         |

\*Abbreviations: SES, Socioeconomic Status; CCI, Charlson Comorbidity Index; BMI, Body Mass Index; PM, Peritoneal Metastases; CRS HIPEC, Cytoreductive Surgery with Hyperthermic Intraperitoneal Chemotherapy

| <b>Supplemental Table 3: CRS HIPEC Cohort and Treatment Outcomes</b> |                                 |                            |                           |                |
|----------------------------------------------------------------------|---------------------------------|----------------------------|---------------------------|----------------|
| <b>Variable</b>                                                      | <b>Whole Cohort<br/>(n=147)</b> | <b>High SES<br/>(n=82)</b> | <b>Low SES<br/>(n=65)</b> | <b>P Value</b> |
| Age                                                                  | 57 (49-64)                      | 57 (50-63)                 | 58 (47-66)                | 0.60           |
| CCI                                                                  | 6 (6-7)                         | 6 (6-7)                    | 6 (6-7)                   | 0.07           |
| AA-CCI                                                               | 8 (7-9)                         | 7 (7-8)                    | 8 (7-9)                   | 0.09           |
| Race                                                                 |                                 |                            |                           | 0.02           |
| White                                                                | 139 (94.6%)                     | 80 (97.6%)                 | 59 (90.8%)                |                |
| Black                                                                | 5 (3.4%)                        | 0 (0.0%)                   | 5 (7.7%)                  |                |
| Asian                                                                | 3 (2.0%)                        | 2 (2.4%)                   | 1 (1.5%)                  |                |
| ADI                                                                  | 42 (20-65)                      | 22 (10-36)                 | 67 (57-78)                | <0.001         |
| Travel Hours to Index Facility                                       | 3.7 (1.2-6.2)                   | 4.9 (1.4-7.2)              | 2.1 (1.1-4.6)             | 0.006          |
| <b>Oncologic Features</b>                                            |                                 |                            |                           |                |
| Synchronous Presentation                                             | 142 (96.6%)                     | 80 (97.6%)                 | 62 (95.4%)                | 0.39           |
| Grade                                                                |                                 |                            |                           | 0.30           |
| G1                                                                   | 42 (28.6%)                      | 19 (23.2%)                 | 23 (35.4%)                |                |
| G2                                                                   | 42 (28.6%)                      | 25 (30.5%)                 | 17 (26.2%)                |                |
| G3                                                                   | 63 (42.8%)                      | 38 (46.3%)                 | 25 (38.4%)                |                |
| Signet Cells                                                         | 61 (41.5%)                      | 37 (45.1%)                 | 24 (36.9%)                | 0.20           |
| Preoperative Chemotherapy                                            | 86 (58.9%)                      | 50 (61.7%)                 | 36 (55.4%)                | 0.44           |
| PCI                                                                  | 17 (12-26)                      | 17 (12-27)                 | 17 (12-24)                | 0.48           |
| <b>Perioperative Outcomes</b>                                        |                                 |                            |                           |                |
| OR Time, hrs                                                         | 9.0 (6.8-11.0)                  | 9.0 (6.9-11.0)             | 8.7 (6.7-11.0)            | 0.56           |
| EBL, mL                                                              | 500 (300-900)                   | 500 (300-1000)             | 500 (300-750)             | 0.50           |
| Stoma                                                                | 51 (34.9%)                      | 26 (32.1%)                 | 25 (38.5%)                | 0.42           |
| Number of Resections                                                 | 3 (2-4)                         | 3 (2-4)                    | 3 (1-5)                   | 0.89           |
| CC Score                                                             |                                 |                            |                           | 0.04           |
| CC-0                                                                 | 104 (71.2%)                     | 52 (64.2%)                 | 52 (80.0%)                |                |
| CC-1                                                                 | 39 (16.7%)                      | 26 (32.1%)                 | 13 (20.0%)                |                |
| CC-2                                                                 | 3 (2.1%)                        | 3 (3.7%)                   | 0 (0.0%)                  |                |
| Comprehensive Complication Score                                     | 25.0 (8.7-37.2)                 | 24.2 (20.9-37.2)           | 26.2 (8.7-36.2)           | 0.96           |
| Major Complications                                                  | 34 (23.3%)                      | 18 (22.2%)                 | 16 (24.6%)                | 0.44           |
| LOS                                                                  | 14 (10-17)                      | 14 (10-18)                 | 12 (10-17)                | 0.15           |
| 90 Day Readmission                                                   | 54 (37.0%)                      | 31 (38.3%)                 | 23 (35.4%)                | 0.43           |

|                  |          |          |          |      |
|------------------|----------|----------|----------|------|
| 90 Day Mortality | 1 (0.7%) | 1 (1.2%) | 0 (0.0%) | 0.56 |
|------------------|----------|----------|----------|------|

\*Abbreviations: SES, Socioeconomic Status; CCI, Charlson Comorbidity Index; AA-CCI, Age Adjusted Charlson Comorbidity Index; ADI, Area Deprivation Index; PCI, Peritoneal Cancer Index; EBL, Estimated Blood Loss, CC Score, Completeness of Cytoreduction Score; LOS, Length of Stay; CRS HIPEC, Cytoreductive Surgery with Hyperthermic Intraperitoneal Chemotherapy

| <b>Supplemental Table 4: Predictors of Survival in CRS Only Cohort</b> |           |            |                |           |            |                |
|------------------------------------------------------------------------|-----------|------------|----------------|-----------|------------|----------------|
| <b>Variable</b>                                                        | <b>HR</b> | <b>95%</b> | <b>P Value</b> | <b>HR</b> | <b>95%</b> | <b>P Value</b> |
| Age                                                                    | 1.103     | 0.88-1.38  | 0.39           | 1.181     | 0.95-1.48  | 0.14           |
| Race                                                                   |           |            |                |           |            |                |
| White                                                                  | ref       |            | 0.58           |           |            |                |
| Black                                                                  | 1.851     | 0.58-5.81  |                |           |            |                |
| Asian                                                                  | 1.155     | 0.16-8.36  |                |           |            |                |
| Insurance Status                                                       |           |            | 0.46           |           |            |                |
| Private                                                                | ref       |            |                |           |            |                |
| Medicare                                                               | 1.3       | 0.74-2.27  |                |           |            |                |
| Medicaid or Uninsured                                                  | 0.579     | 0.14-2.39  |                |           |            |                |
| Employed                                                               | 0.88      | 0.54-1.44  | 0.61           |           |            |                |
| Low SES                                                                | 1.609     | 0.99-2.62  | 0.06           | 2.278     | 1.38-3.75  | 0.001          |
| Travel Hours to Index Facility                                         | 0.971     | 0.92-1.02  | 0.25           |           |            |                |
| Travel Hours to Closest Facility                                       | 0.995     | 0.95-1.04  | 0.81           |           |            |                |
| Peritoneal Metastases on Diagnosis                                     | 0.496     | 0.15-1.59  | 0.24           |           |            |                |
| Grade                                                                  |           |            | <0.001         |           |            |                |
| 1                                                                      | ref       |            |                | ref       |            | 0.001          |
| 2                                                                      | 3.763     | 1.54-9.20  |                | 6.584     | 1.64-26.38 |                |
| 3                                                                      | 6.885     | 3.03-15.62 |                | 11.66     | 2.92-46.63 |                |
| Signet Cells                                                           | 3.771     | 2.25-6.44  | <0.001         |           |            |                |
| PCI                                                                    | 1.026     | 1.00-1.05  | 0.06           | 1.03      | 1.00-1.06  | 0.008          |
| Preoperative Chemotherapy                                              | 0.649     | 0.40-1.06  | 0.08           |           |            |                |
| OR Time                                                                | 1.101     | 1.00-1.21  | 0.05           |           |            |                |
| EBL (per 100 mL)                                                       | 1.024     | 0.99-1.06  | 0.2            |           |            |                |
| Stoma                                                                  | 0.85      | 0.50-1.43  | 0.54           |           |            |                |
| Number of Resections                                                   | 1.129     | 0.98-1.30  | 0.08           |           |            |                |
| CC Score                                                               |           |            | 0.67           |           |            |                |
| CC-0                                                                   | ref       |            |                |           |            |                |
| CC-1                                                                   | 1.067     | 0.62-1.83  |                |           |            |                |
| CC-2                                                                   | 2.464     | 0.33-18.12 |                |           |            |                |
| Chemotherapy                                                           | 3.988     | 1.70-9.34  | 0.001          | 0.689     | 0.16-2.94  | 0.61           |
